# Supplementary material for: Climatic Warming-Induced Drought Stress Has Resulted in the Transition of Tree Growth Sensitivity from Temperature to Precipitation in the Loess Plateau of China
Source: MDPI journal article supplement (doi:10.3390/biology12101275), 2023-09-25
Supplement: s1 [file s1]

Table. S1 Information about the 53 tree-ring chronologies in the Loess Plateau.

| Order | Longitude<br>(°) | Latitude<br>(°) | Precipitation<br>(mm) | Temperature<br>(°C) | Elevation<br>(m) | Tree species                       | refs cites                |
|-------|------------------|-----------------|-----------------------|---------------------|------------------|------------------------------------|---------------------------|
| 1     | 109.83           | 34.30           |                       |                     | 2600             | <i>Abies chensiensis</i>           | Cai <i>et al.</i> , 2014  |
| 2     | 108.03           | 33.88           | 1018.1                | 6.4                 | 2540             | <i>Abies fargesii</i>              | Dang <i>et al.</i> , 2007 |
| 3     | 108.03           | 33.88           | 1047.5                | 5.2                 | 2350             | <i>Abies fargesii</i>              | Dang <i>et al.</i> , 2007 |
| 4     | 108.03           | 33.88           | 1083.2                | 3.7                 | 2360             | <i>Abies fargesii</i>              | Dang <i>et al.</i> , 2007 |
| 5     | 108.03           | 33.88           | 1016.8                | 6.5                 | 2480             | <i>Abies fargesii</i>              | Dang <i>et al.</i> , 2007 |
| 6     | 108.03           | 33.88           | 1032.6                | 5.9                 | 2760             | <i>Abies fargesii</i>              | Dang <i>et al.</i> , 2007 |
| 7     | 108.03           | 33.88           | 1070.5                | 4.3                 | 2670             | <i>Abies fargesii</i>              | Dang <i>et al.</i> , 2007 |
| 8     | 109.28           | 40.41           | 256.0                 | 7.1                 | 1474             | <i>Juniperus rigida</i>            | Dang <i>et al.</i> , 2007 |
| 9     | 107.80           | 34.00           | 850.0                 | 1.9                 | 3216             | <i>Larix chinensis</i>             | Qi <i>et al.</i> , 2020   |
| 10    | 107.80           | 33.98           |                       |                     | 3200             | <i>Larix chinensis</i>             | Su <i>et al.</i> , 2018   |
| 11    | 107.80           | 33.98           |                       |                     | 3300             | <i>Larix chinensis</i>             | Su <i>et al.</i> , 2018   |
| 12    | 107.77           | 33.93           |                       |                     | 3270             | <i>Larix chinensis</i>             | Sun <i>et al.</i> , 2010  |
| 13    | 107.81           | 34.00           |                       |                     | 3200             | <i>Larix chinensis</i>             | Zhu, 2019                 |
| 14    | 107.78           | 33.93           |                       |                     | 3200             | <i>Larix chinensis</i>             | Zhu, 2019                 |
| 15    | 111.45           | 37.83           | 463.8                 | 9.7                 | 2200             | <i>Larix principisrupprechtii</i>  | Cai <i>et al.</i> , 2013a |
| 16    | 111.92           | 38.75           |                       |                     | 2621             | <i>Larix principis-rupprechtii</i> | Li <i>et al.</i> , 2016   |
| 17    | 111.90           | 38.73           |                       |                     | 2339             | <i>Larix principis-rupprechtii</i> | Li <i>et al.</i> , 2016   |
| 18    | 109.51           | 40.40           | 306.5                 | 7.1                 | 1450             | <i>Platycladus orientalis</i>      | Sun <i>et al.</i> , 2021  |
| 19    | 101.57           | 37.49           | 318.0                 |                     | 2750             | <i>Picea crassifolia</i>           | Liu <i>et al.</i> , 2021  |
| 20    | 101.57           | 37.48           | 318.0                 |                     | 3000             | <i>Picea crassifolia</i>           | Liu <i>et al.</i> , 2021  |
| 21    | 101.91           | 37.70           | 167.0                 | 8.0                 | 2750             | <i>Picea crassifolia</i>           | Deng <i>et al.</i> , 2013 |
| 22    | 111.45           | 37.83           | 463.8                 | 9.7                 | 2200             | <i>Picea meyeri</i>                | Cai <i>et al.</i> , 2013b |

|    |        |       |       |      |      |                            |                            |
|----|--------|-------|-------|------|------|----------------------------|----------------------------|
| 23 | 103.40 | 35.24 |       |      | 2600 | <i>Picea purpurea</i>      | Ren <i>et al.</i> , 2014   |
| 24 | 104.24 | 34.99 | 511.0 | 5.1  | 2350 | <i>Picea purpurea</i>      | Song <i>et al.</i> , 2021  |
| 25 | 104.24 | 34.99 | 510.0 | 5.94 | 2350 | <i>Picea purpurea</i>      | Sun <i>et al.</i> , 2018   |
| 26 | 112.37 | 39.36 |       |      | 1762 | <i>Picea wilsonii</i>      | Zhang <i>et al.</i> , 2018 |
| 27 | 104.07 | 35.78 |       |      | 2350 | <i>Picea wilsonii</i>      | Chen <i>et al.</i> , 2015  |
| 28 | 110.08 | 34.47 |       |      |      | <i>Pinus armandii</i>      | ITRDB                      |
| 29 | 110.08 | 34.47 |       |      |      | <i>Pinus armandii</i>      | ITRDB                      |
| 30 | 112.40 | 36.90 |       |      | 1450 | <i>Pinus tabulaeformis</i> | Cai <i>et al.</i> , 2014   |
| 31 | 106.53 | 35.52 | 503.0 | 8.8  | 2000 | <i>Pinus tabulaeformis</i> | Song <i>et al.</i> , 2011  |
| 32 | 110.07 | 34.47 | 900.0 | 5.9  | 2082 | <i>Pinus tabulaeformis</i> | Liu <i>et al.</i> , 2009   |
| 33 | 111.33 | 37.77 | 463.8 | 9.7  | 1820 | <i>Pinus tabulaeformis</i> | Cai <i>et al.</i> , 2013b  |
| 34 | 102.43 | 36.41 |       |      |      | <i>Pinus tabulaeformis</i> | Wang <i>et al.</i> , 2009a |
| 35 | 106.27 | 37.30 | 240.6 | 9.2  | 2400 | <i>Pinus tabulaeformis</i> | Wang <i>et al.</i> , 2013  |
| 36 | 111.97 | 38.70 |       |      | 1800 | <i>Pinus tabulaeformis</i> | Fang <i>et al.</i> , 2009  |
| 37 | 112.08 | 38.83 |       |      | 1900 | <i>Pinus tabulaeformis</i> | Li <i>et al.</i> , 2015a   |
| 38 | 102.65 | 36.83 | 436.5 | 2.3  | 2200 | <i>Pinus tabulaeformis</i> | Li <i>et al.</i> , 2012    |
| 39 | 113.45 | 37.40 | 520.0 | 10.0 | 1440 | <i>Pinus tabulaeformis</i> | Cai <i>et al.</i> , 2013a  |
| 40 | 103.80 | 37.40 | 306.7 | 4.9  | 2500 | <i>Pinus tabulaeformis</i> | Gao <i>et al.</i> , 2005   |
| 41 | 106.27 | 37.30 | 240.6 | 9.2  | 2400 | <i>Pinus tabulaeformis</i> | Wang <i>et al.</i> , 2013  |
| 42 | 112.08 | 38.83 |       |      | 1800 | <i>Pinus tabulaeformis</i> | Li <i>et al.</i> , 2015b   |
| 43 | 106.51 | 35.54 | 494.6 | 8.6  | 1800 | <i>Pinus tabulaeformis</i> | Fang <i>et al.</i> , 2012  |
| 44 | 106.16 | 37.19 | 271.9 | 8.9  | 2300 | <i>Pinus tabulaeformis</i> | Wang <i>et al.</i> , 2009b |
| 45 | 112.08 | 38.83 | 420.0 | 5.0  | 2400 | <i>Pinus tabulaeformis</i> | Li <i>et al.</i> , 2006    |
| 46 | 109.78 | 35.65 | 611.8 | 8.6  | 1427 | <i>Pinus tabulaeformis</i> | Cai <i>et al.</i> , 2005   |
| 47 | 106.27 | 37.28 | 240.6 | 9.2  | 2600 | <i>Pinus tabulaeformis</i> | Wang <i>et al.</i> , 2013  |

|    |        |       |       |     |      |                            |                            |
|----|--------|-------|-------|-----|------|----------------------------|----------------------------|
| 48 | 106.15 | 34.45 |       |     | 2080 | <i>Pinus tabulaeformis</i> | Chen <i>et al.</i> , 2014  |
| 49 | 110.42 | 39.29 | 400.0 | 7.0 | 1347 | <i>Pinus tabulaeformis</i> | Liang <i>et al.</i> , 2004 |
| 50 | 111.72 | 38.97 |       |     | 1745 | <i>Pinus tabulaeformis</i> | Zhang <i>et al.</i> , 2018 |
| 51 | 106.10 | 35.58 | 425.0 | 6.3 | 1753 | <i>Pinus tabulaeformis</i> | Wang <i>et al.</i> , 2009  |
| 52 | 103.39 | 35.23 |       |     | 2589 | <i>Sabina przewalskii</i>  | Fang <i>et al.</i> , 2014  |
| 53 | 102.31 | 36.59 |       |     | 3100 | <i>Sabina przewalskii</i>  | Zhang <i>et al.</i> , 2009 |

All references in the supplementary material are in the text references 62-96.

**Table. S2** The comparison of tree ring indices, growth rate and climatic sensitivity during the two warming phases in the Loess Plateau.

| Tree growth rate and climatic sensitivity | 1910 - 1940        | 1970 - 2000        |
|-------------------------------------------|--------------------|--------------------|
|                                           | Mean $\pm$ SD      | Mean $\pm$ SD      |
| Tree-ring indices                         | -0.010 $\pm$ 0.984 | -0.089 $\pm$ 0.961 |
| Tree growth rate                          | 0.027 $\pm$ 0.020  | -0.016 $\pm$ 0.032 |
| Climatic sensitivity-temperature          | 0.082 $\pm$ 0.206  | -0.131 $\pm$ 0.232 |
| Climatic sensitivity-precipitation        | -0.021 $\pm$ 0.226 | 0.073 $\pm$ 0.225  |
| Climatic sensitivity-SPEI                 | -0.085 $\pm$ 0.224 | 0.077 $\pm$ 0.240  |

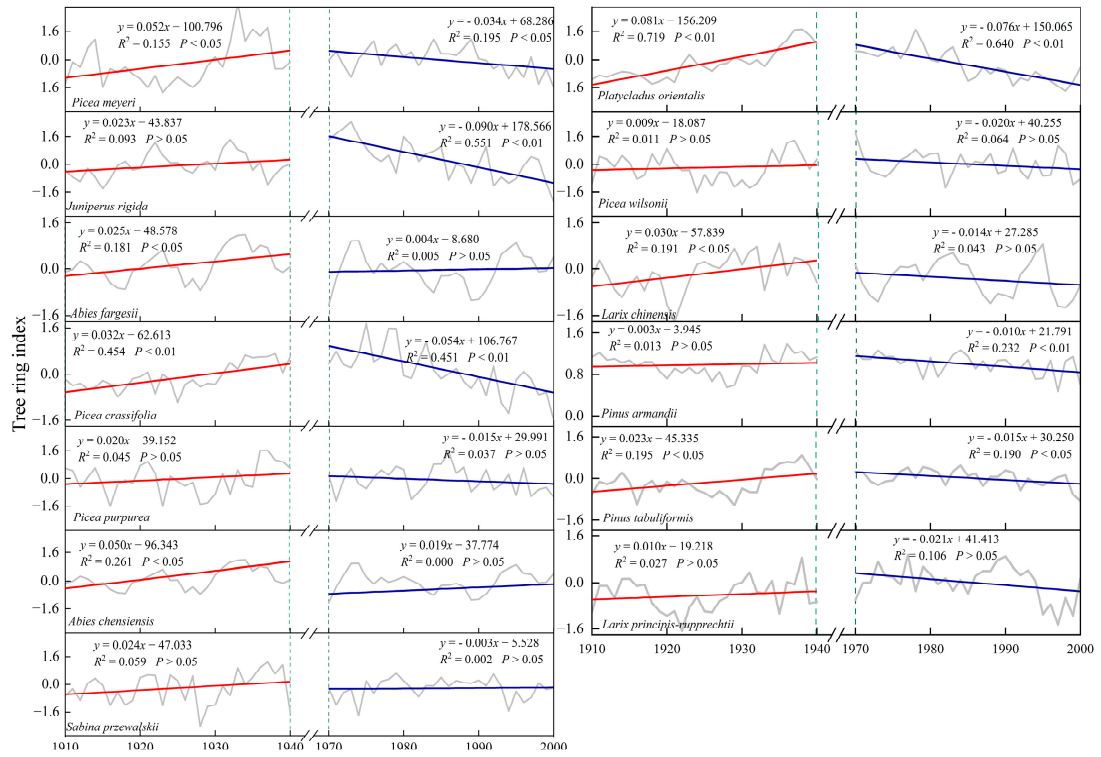

**Figure S1.** Trends in growth rates of different tree species in two warming phases.

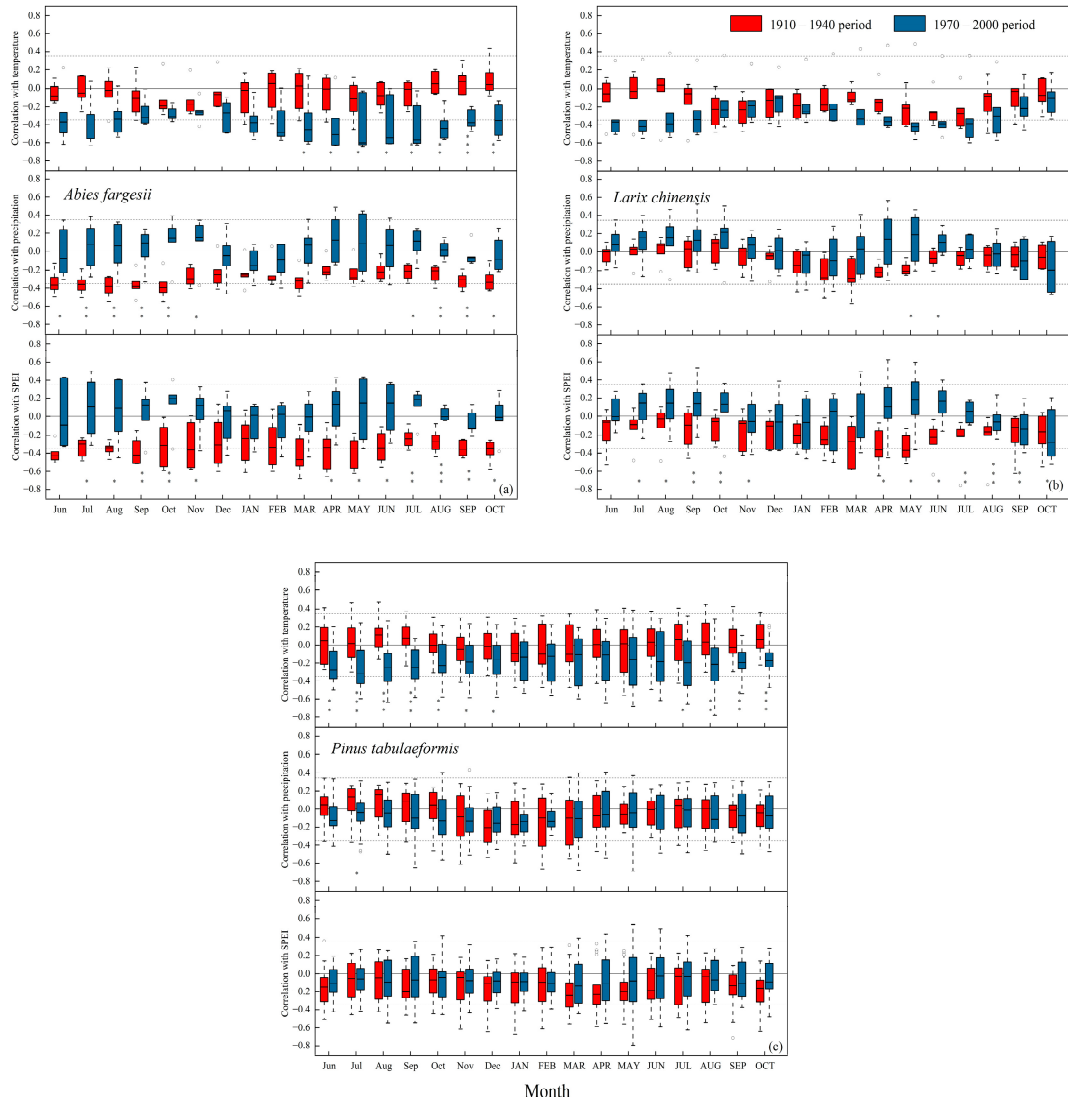

**Figure S2.** Correlation of tree rings index with temperature and precipitation for different tree species in two warming phases.

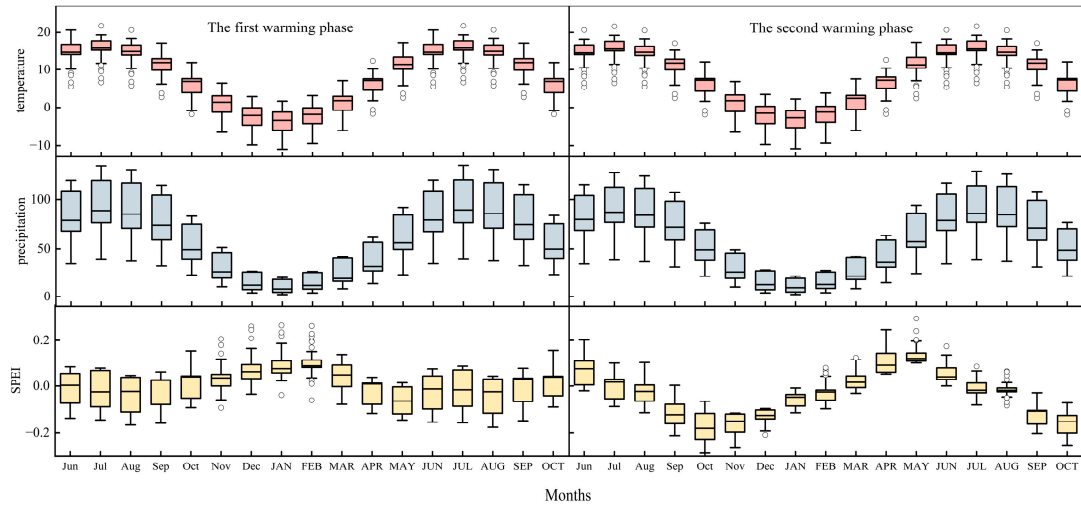

**Figure S3.** Monthly changes in different climate factors during the two warming phases.
